# Supplementary material for: An Overview of Systematic Reviews of Using Chinese Medicine to Treat Polycystic Ovary Syndrome
Source: PubMed Central journal article supplement (PMC8179771; doi:10.1155/2021/9935536), 2021-05-28
Supplement: 9935536.f1.pdf [file 9935536.f1.pdf]

## Sifting

| Serial | outcomes                                                                                                                                                                             | fund                                                                                                                                                                                                                                                                                                                                | database                                                  | num of study | Total | T                                                                    | C                          | Bias evaluation               |       |
|--------|--------------------------------------------------------------------------------------------------------------------------------------------------------------------------------------|-------------------------------------------------------------------------------------------------------------------------------------------------------------------------------------------------------------------------------------------------------------------------------------------------------------------------------------|-----------------------------------------------------------|--------------|-------|----------------------------------------------------------------------|----------------------------|-------------------------------|-------|
| 42     | Relegation factors, Cycle ovulation rate, Improvement rate of menstruation, T, BMI                                                                                                   |                                                                                                                                                                                                                                                                                                                                     | 3+ChCTR+H<br>CTR+embas<br>+ovint+CFM<br>3+pbmd+Co<br>chrn | 4            | 280   | Fu Fang Xuan Jv Jiao<br>Nang+Western medicine                        | Western medicine           | Cochranehandbook              |       |
| 39     | efficiency, ovulation rate, Relegation factors                                                                                                                                       |                                                                                                                                                                                                                                                                                                                                     | 3+cbm                                                     | 22           | 1763  | traditional<br>medicine+Western<br>medicine                          | Western medicine           | Cochranehandbook              |       |
| 35     | efficiency, Relegation factors, ovulation rate, LH, LH/FSH, T                                                                                                                        |                                                                                                                                                                                                                                                                                                                                     | 3+cbm                                                     | 13           | 1148  | traditional medicine+<br>traditional medicine+<br>(Western medicine) | Western medicine           | Cochranehandbook              |       |
| 33     | ovulation rate, Relegation factors                                                                                                                                                   |                                                                                                                                                                                                                                                                                                                                     | 3+cbm+pb<br>md+embase                                     | 12           | 1213  | traditional<br>medicine+Western<br>medicine                          | Western medicine           | Jadad                         |       |
| 32     | Relegation factors, ovulation rate, efficiency                                                                                                                                       |                                                                                                                                                                                                                                                                                                                                     | 3                                                         | 23           | -     | traditional medicine+<br>(Western medicine)                          | Western medicine           | -                             |       |
| 30     | efficiency, androgen, LH, LH/FSH, Relegation factors                                                                                                                                 | Guangdong Provincial Science and Technology Planning Project<br>(2014A020212273)                                                                                                                                                                                                                                                    | 3+cbm+pb<br>md+co+sci                                     | 3            | 8     | -                                                                    | 调周法+ (Western<br>medicine) | Western medicine              | Jadad |
| 28     | efficiency, Relegation factors                                                                                                                                                       | Guangdong Provincial Science and Technology Planning Project<br>(2014A020212273)                                                                                                                                                                                                                                                    | 3+cbm+pb<br>md+co+sci                                     | 22           | 1676  | Tonify the<br>kidneytraditional<br>medicine+Diane-35                 | Diane-35                   | Jadad                         |       |
| 22     | efficiency, Relegation factors, Cycle ovulation rate                                                                                                                                 | Chinese medicine project of Jiangxi Health and Family Planning<br>Commission (No.201540873)<br>Medical Guidance Science and technology supporting project of Shanghai<br>Science and Technology Commission (16401934500); Shanghai<br>School of Traditional Chinese medicine,shanghai university of traditional<br>Chinese medicine | 3+pbmd+m<br>edline+Scie<br>ncedirect                      | 22           | -     | traditional medicineTonify<br>the kidneyinvigorate the<br>blood      | Western medicine           | Jadad                         |       |
| 21     | efficiency, ovulation rate, Cycle ovulation rate, Relegation factors                                                                                                                 | Surface Project of National Natural Science Foundation of China<br>(No.81673661)                                                                                                                                                                                                                                                    | 3+pbmd+Co<br>chrn                                         | 14           | 1057  | traditional medicine+Western<br>medicine                             | Western medicine           | Cochranehandbook              |       |
| 20     | Relegation factors, ovulation rate                                                                                                                                                   |                                                                                                                                                                                                                                                                                                                                     | 3+pbmd+ovi<br>d                                           | 11           | 1128  | Kun Tai capsule+Western<br>medicine                                  | Western medicine           | Cochranehandbook              |       |
| 19     | Relegation factors, ovulation rate, FSH, LH, T, Insulin content.                                                                                                                     |                                                                                                                                                                                                                                                                                                                                     | 3+cbm+3                                                   | 7            | 634   | traditional medicineTonify<br>the kidneyinvigorate the<br>blood      | Clomifene Citrate          | Cochranehandbook              |       |
| 17     | efficiency, Relegation factors, ovulation rate, Ovarian volume, Number of<br>mature follicles, LH, FSH, LH/FSH, E2, T                                                                |                                                                                                                                                                                                                                                                                                                                     | 3+cbm+2+<br>medline                                       | 34           | -     | traditional medicineTonify<br>the kidneyinvigorate the<br>blood      | Western medicine           | Cochranehandbook              |       |
| 13     | efficiency, FSH, LH, LH/FSH, T, BMI, ovulation rate, physical sign<br>score                                                                                                          | Projects supported by the National Natural Science Foundation of China<br>(No.81804135)                                                                                                                                                                                                                                             | 3+cbm+3                                                   | 20           | 1484  | traditional medicineTonify<br>the kidneyinvigorate the<br>blood      | Western medicine           | Jadad                         |       |
| 12     | efficiency, ovulation rate, Relegation factors, estrogen, Degree of<br>endometrial thickening                                                                                        | Surface Project of National Natural Science Foundation of China<br>(No.81801466)                                                                                                                                                                                                                                                    | 3+cbm+3                                                   | 15           | 1259  | Fu Fang Xuan Jv Jiao<br>Nang+Western medicine                        | Western medicine           | Jadad                         |       |
| 11     | efficiency, TCM syndrome, Relegation factors, Biphasic rate of basal body<br>temperature, TCM syndrome score, BMI, Acne score, LH, FSH, LH/FSH,<br>T, E2, PRL, Insulin content, etc. |                                                                                                                                                                                                                                                                                                                                     | 3+cbm+3                                                   | 43           | 3056  | traditional medicine                                                 | Western medicine           | Cochranehandbook              |       |
| 10     | efficiency, ovulation rate, Relegation factors, Number of mature follicles                                                                                                           | National Natural Science Foundation of China (No.81802630)                                                                                                                                                                                                                                                                          | 3+cbm+1                                                   | 13           | 1305  | Kun Tai<br>capsule+Letrozole                                         | Letrozole                  | Jadad                         |       |
| 8      | Relegation factors, Cycle ovulation rate, TCM syndrome, T, Endometrial<br>thickness                                                                                                  | Guangxi University of Chinese Medicine school-level research program<br>(No.20168009) ;State Administration of Traditional Chinese Medicine                                                                                                                                                                                         | 3+Chi+pbm<br>dic                                          | 14           | 1100  | Fu Fang Xuan Jv Jiao<br>Nang+Western medicine                        | Western medicine           | Cochranehandbook              |       |
| 7      | efficiency, ovulation rate, Relegation factors, T, LH, LH/FSH                                                                                                                        |                                                                                                                                                                                                                                                                                                                                     | 3+cbm+3+1                                                 | 26           | 1299  | traditional<br>medicine+Western<br>medicine                          | Western medicine           | Cochranehandbook              |       |
| 4      | efficiency, Relegation factors, ovulation rate, Ovarian volume, T, LH,<br>FSH                                                                                                        | Natural Science Foundation of Fujian Province (NO.2019J01351) ;Key<br>projects supported by the Joint Fund of the National Natural Science<br>Foundation of China                                                                                                                                                                   | 3+pbmd+Co<br>chrn                                         | 7            | 502   | Gui Shen Wan+Western<br>medicine                                     | Western medicine           | Cochranehandbook              |       |
| 2      | Endometrial thickness, endometrial type, uterine a pulsation index, uterine<br>a resistance index, Relegation factorsTCM syndrome score, efficiency                                  | State Administration of Traditional Chinese Medicine (1199vs02) Subject<br>of Guangdong Traditional Chinese Medicine Bureau (20181120)                                                                                                                                                                                              | 3+1+3+1                                                   | 13           | 797   | traditional<br>medicine+Western<br>medicine                          | Western medicine           | CochraneCollaborator<br>tools |       |

| Characteristics |                             |                     |                        |                |                                                                                     |                       |                  |                                                                                                                                                                                                                                                                                                                     |                                                                                                                                                                                                                                                                                                                   |                                    |    |  |
|-----------------|-----------------------------|---------------------|------------------------|----------------|-------------------------------------------------------------------------------------|-----------------------|------------------|---------------------------------------------------------------------------------------------------------------------------------------------------------------------------------------------------------------------------------------------------------------------------------------------------------------------|-------------------------------------------------------------------------------------------------------------------------------------------------------------------------------------------------------------------------------------------------------------------------------------------------------------------|------------------------------------|----|--|
| Serial number   | Included Systematic Reviews | Number of databases | number of include RCTs | Total subjects | Experimental group                                                                  | Control group         | Bias evaluation  | fund                                                                                                                                                                                                                                                                                                                | conclusion                                                                                                                                                                                                                                                                                                        | 质量                                 | 局限 |  |
| 40              | Yan, Lian et al. 2015       | 4                   | 13                     | 1144           | Chinese medicine + (Western medicine)                                               | Western medicine      | CochraneHandbook |                                                                                                                                                                                                                                                                                                                     | Tonify the kidney/traditional medicine (TCM) POCS的疗效优于非TCM的POCS的疗效。 证据质量: evaluation rate, Religation factors的异质性。 与TCM联合使用能更有效地改善肾功能。 仅TCM的kidney/traditional medicine的POCS能明显改善肾功能。 有证据支持。                                                                                                                      | 3-dcm                              |    |  |
| 39              | Xiao Chao 2016              | 7                   | 12                     | 1213           | Chinese Medicine + Western Medicine                                                 | Western medicine      | Jatad            |                                                                                                                                                                                                                                                                                                                     | Strengthen the blood (补血) 改善肾功能。 证据质量: evaluation rate, Religation factors. 改善肾功能, LUTS, T-BS. 与有缺陷的研究相比, 有证据支持。 Tonify the kidney/traditional medicine的联合使用能更有效地改善肾功能。 证据质量: evaluation rate, Religation factors.                                                                                                | 3-cdm+2-cdm+2-cdm                  |    |  |
| 38              | Li Nan et al. 2017          | 3                   | 23                     | 1148           | Chinese medicine + (Western medicine)                                               | Western medicine      | -                |                                                                                                                                                                                                                                                                                                                     | 中医药联合行POCS不优于西医治疗。 是一种具有发展前景的新疗法。                                                                                                                                                                                                                                                                                 |                                    | 3  |  |
| 37              | Lu Ba-Ling et al. 2018      | 7                   | 22                     | 1678           | Kidney Tonic Herbs + Dosing-35                                                      | Western medicine      | Jatad            | Guangdong Provincial Science and Technology Planning Project (2014A02021273)。                                                                                                                                                                                                                                       | 没有证据显示Tonify the kidney/traditional medicine (TCM-35) (POCS) 优于, 证明其比非TCM-35 (非TCM-35) (Religation factors, adverse effects) 少。 与TCM联合使用能更有效地改善肾功能。 证据质量: evaluation rate, Religation factors. 改善肾功能, physical sign 及实验室检查。 证据质量: evaluation rate, Religation factors. 证据质量: evaluation rate, Religation factors. | 3-dcm+2-cdm+2-cdm                  |    |  |
| 36              | Xu Li-Fang et al. 2018      | 6                   | 22                     | 1678           | Chinese medicine to tonify the kidney and invigorate the blood + (Western medicine) | Western medicine      | Jatad            | Chinese medicine project of Jiangxi Health and Family Planning Commission [No.2015A007]。                                                                                                                                                                                                                            | Strengthen the blood (补血) 改善肾功能。 证据质量: evaluation rate, Religation factors. 改善肾功能, physical sign 及实验室检查。 证据质量: evaluation rate, Religation factors. 证据质量: evaluation rate, Religation factors.                                                                                                                    | 2-cdm+2-cdm+2-cdm                  |    |  |
| 22              | Xu Huiyun et al. 2018       | 3                   | 14                     | 978            | Herbal manual cycle + (Western)                                                     | Western medicine      | Jatad            | Medical Guidance Science and Technology supporting project of Shanghai Science and Technology Commission (14451940407) ; Shanghai School of Traditional Chinese medicine ca gynecological school heritage SRI (No.13442242.1.13016)。                                                                                | Strengthen the blood (补血) 改善肾功能。 证据质量: evaluation rate, Religation factors. 改善肾功能, physical sign 及实验室检查。 证据质量: evaluation rate, Religation factors. 证据质量: evaluation rate, Religation factors.                                                                                                                    | 3                                  |    |  |
| 21              | Huang, Wenfang et al. 2018  | 5                   | 14                     | 1057           | Liver relaxation method + Western medicine                                          | Western medicine      | CochraneHandbook | Support Project of National Natural Science Foundation of China (No.81273461)。                                                                                                                                                                                                                                      | Strengthen the blood (补血) 改善肾功能。 证据质量: evaluation rate, Religation factors. 改善肾功能, physical sign 及实验室检查。 证据质量: evaluation rate, Religation factors. 证据质量: evaluation rate, Religation factors.                                                                                                                    | 3-cdm+2-cdm                        |    |  |
| 20              | Liu Ying et al. 2019        | 5                   | 11                     | 1128           | Kitasi capsule + Western medicine                                                   | Western medicine      | CochraneHandbook |                                                                                                                                                                                                                                                                                                                     | Kitasi capsule (补血) 改善肾功能。 证据质量: evaluation rate, Religation factors. 改善肾功能, physical sign 及实验室检查。 证据质量: evaluation rate, Religation factors. 证据质量: evaluation rate, Religation factors.                                                                                                                          | 3-cdm+2-cdm                        |    |  |
| 19              | Huan Bouchao 2019           | 7                   | 7                      | 634            | Chinese herbal remedies to tonify the kidney and invigorate the blood               | Chlophenazone         | CochraneHandbook |                                                                                                                                                                                                                                                                                                                     | Tonify the kidney/traditional medicine (TCM) 改善肾功能。 证据质量: evaluation rate, Religation factors. 改善肾功能, physical sign 及实验室检查。 证据质量: evaluation rate, Religation factors. 证据质量: evaluation rate, Religation factors.                                                                                                 | 3-cdm+3                            |    |  |
| 17              | Ji Liu 2019                 | 7                   | 34                     | 1148           | Chinese medicine to tonify the kidney and invigorate the blood + (Western medicine) | Western medicine      | CochraneHandbook |                                                                                                                                                                                                                                                                                                                     | Strengthen the blood (补血) 改善肾功能。 证据质量: evaluation rate, Religation factors. 改善肾功能, physical sign 及实验室检查。 证据质量: evaluation rate, Religation factors. 证据质量: evaluation rate, Religation factors.                                                                                                                    | FBI: Not statistically significant |    |  |
| 16              | Xu Peng Peng et al. 2019    | 7                   | 20                     | 1444           | Plus or minus Cang Fu Gui Pills+ Tang + Western medicine                            | Western medicine      | Jatad            | Projects supported by the National Natural Science Foundation of China (No.81411315)。                                                                                                                                                                                                                               | Strengthen the blood (补血) 改善肾功能。 证据质量: evaluation rate, Religation factors. 改善肾功能, physical sign 及实验室检查。 证据质量: evaluation rate, Religation factors. 证据质量: evaluation rate, Religation factors.                                                                                                                    | 3-cdm+3                            |    |  |
| 15              | Zhang Yisheng et al. 2019   | 7                   | 15                     | 1259           | Compound Xianju Capsules + Western Medicine                                         | Western medicine      | Jatad            | Support Project of National Natural Science Foundation of China (No.81301444)。                                                                                                                                                                                                                                      | Fu Fang Xuan Ju Xian Nang 补血 改善肾功能。 证据质量: evaluation rate, Religation factors. 改善肾功能, physical sign 及实验室检查。 证据质量: evaluation rate, Religation factors. 证据质量: evaluation rate, Religation factors.                                                                                                                 | 3-cdm+3                            |    |  |
| 11              | Yufang Dong 2020            | 7                   | 43                     | 3556           | Chinese medicine                                                                    | Western medicine      | CochraneHandbook |                                                                                                                                                                                                                                                                                                                     | Strengthen the blood (补血) 改善肾功能。 证据质量: evaluation rate, Religation factors. 改善肾功能, physical sign 及实验室检查。 证据质量: evaluation rate, Religation factors. 证据质量: evaluation rate, Religation factors.                                                                                                                    | FBI: Not statistically significant |    |  |
| 10              | Li Nan et al. 2020          | 5                   | 13                     | 1305           | Kitasi capsule + Lidozole                                                           | Lidozole (antibiotic) | Jatad            | National Natural Science Foundation of China (No.81802230)。                                                                                                                                                                                                                                                         | Strengthen the blood (补血) 改善肾功能。 证据质量: evaluation rate, Religation factors. 改善肾功能, physical sign 及实验室检查。 证据质量: evaluation rate, Religation factors. 证据质量: evaluation rate, Religation factors.                                                                                                                    | 3-cdm+1                            |    |  |
| 8               | Dai Xiu et al. 2020         | 6                   | 14                     | 1100           | Compound Xianju Capsules + Western Medicine                                         | Western medicine      | CochraneHandbook | Guangxi University of Chinese Medicine school-level research project (No.201901003009) ; State Administration of Traditional Chinese Medicine (2019YF042) ; Subject of Guangxi Traditional Chinese Medicine Bureau (20181128)。                                                                                      | Strengthen the blood (补血) 改善肾功能。 证据质量: evaluation rate, Religation factors. 改善肾功能, physical sign 及实验室检查。 证据质量: evaluation rate, Religation factors. 证据质量: evaluation rate, Religation factors.                                                                                                                    | 3-Chipdcm+2-cdm                    |    |  |
| 7               | Lim Bui Thi 2020            | 6                   | 20                     | 1299           | Chinese kiter + Western medicine for kidney and liver                               | Western medicine      | CochraneHandbook |                                                                                                                                                                                                                                                                                                                     | Tonify the kidney/traditional medicine (TCM) 改善肾功能。 证据质量: evaluation rate, Religation factors. 改善肾功能, physical sign 及实验室检查。 证据质量: evaluation rate, Religation factors. 证据质量: evaluation rate, Religation factors.                                                                                                 | 3-cdm-3+1                          |    |  |
| 4               | Chan Kam Ming et al. 2020   | 5                   | 7                      | 502            | Gui Ren Pills + Western Medicine                                                    | Western medicine      | CochraneHandbook | Natural Science Foundation of Fujian Province (No.20191013151) ; Key projects supported by the Joint Fund of the National Natural Science Foundation of China (No.81500157) ; State Administration of Traditional Chinese Medicine (2019YF042) ; Subject of Guangxi Traditional Chinese Medicine Bureau (20181128)。 | Strengthen the blood (补血) 改善肾功能。 证据质量: evaluation rate, Religation factors. 改善肾功能, physical sign 及实验室检查。 证据质量: evaluation rate, Religation factors. 证据质量: evaluation rate, Religation factors.                                                                                                                    | FBI: Not statistically significant |    |  |
| 2               | Huang Tang et al. 2020      | 8                   | 13                     | 797            | Kidney Tonic Herbs + Chlophenazone                                                  | Chlophenazone         | CochraneHandbook |                                                                                                                                                                                                                                                                                                                     | Strengthen the blood (补血) 改善肾功能。 证据质量: evaluation rate, Religation factors. 改善肾功能, physical sign 及实验室检查。 证据质量: evaluation rate, Religation factors. 证据质量: evaluation rate, Religation factors.                                                                                                                    | 3+1-2+1                            |    |  |

| Ref | Author       | Year | Journal                                       | Country | Design                      | Sample | Measures | Outcome | Findings | Strength of evidence | Publication bias | Indirectness | Inconsistency | Imprecision | Limitation |
|-----|--------------|------|-----------------------------------------------|---------|-----------------------------|--------|----------|---------|----------|----------------------|------------------|--------------|---------------|-------------|------------|
| 1   | Leung et al. | 2010 | Journal of Clinical Pharmacy and Therapeutics | China   | Randomised controlled trial | 100    | ABC-100  | 100     | 100      | 100                  | 100              | 100          | 100           | 100         | 100        |
| 2   | Leung et al. | 2011 | Journal of Clinical Pharmacy and Therapeutics | China   | Randomised controlled trial | 100    | ABC-100  | 100     | 100      | 100                  | 100              | 100          | 100           | 100         | 100        |
| 3   | Leung et al. | 2012 | Journal of Clinical Pharmacy and Therapeutics | China   | Randomised controlled trial | 100    | ABC-100  | 100     | 100      | 100                  | 100              | 100          | 100           | 100         | 100        |
| 4   | Leung et al. | 2013 | Journal of Clinical Pharmacy and Therapeutics | China   | Randomised controlled trial | 100    | ABC-100  | 100     | 100      | 100                  | 100              | 100          | 100           | 100         | 100        |
| 5   | Leung et al. | 2014 | Journal of Clinical Pharmacy and Therapeutics | China   | Randomised controlled trial | 100    | ABC-100  | 100     | 100      | 100                  | 100              | 100          | 100           | 100         | 100        |
| 6   | Leung et al. | 2015 | Journal of Clinical Pharmacy and Therapeutics | China   | Randomised controlled trial | 100    | ABC-100  | 100     | 100      | 100                  | 100              | 100          | 100           | 100         | 100        |
| 7   | Leung et al. | 2016 | Journal of Clinical Pharmacy and Therapeutics | China   | Randomised controlled trial | 100    | ABC-100  | 100     | 100      | 100                  | 100              | 100          | 100           | 100         | 100        |
| 8   | Leung et al. | 2017 | Journal of Clinical Pharmacy and Therapeutics | China   | Randomised controlled trial | 100    | ABC-100  | 100     | 100      | 100                  | 100              | 100          | 100           | 100         | 100        |
| 9   | Leung et al. | 2018 | Journal of Clinical Pharmacy and Therapeutics | China   | Randomised controlled trial | 100    | ABC-100  | 100     | 100      | 100                  | 100              | 100          | 100           | 100         | 100        |
| 10  | Leung et al. | 2019 | Journal of Clinical Pharmacy and Therapeutics | China   | Randomised controlled trial | 100    | ABC-100  | 100     | 100      | 100                  | 100              | 100          | 100           | 100         | 100        |

① Limitation; ② Inconsistency; ③ Indirectness; ④ Publication bias; ⑤ Imprecision.

AMSTAR 2

| Included Systematic Reviews   | 1    | 2  | 3  | 4    | 5   | 6   | 7  | 8    | 9   | 10 | 11  | 12    | 13  | 14  | 15  | 16 | Credibility |
|-------------------------------|------|----|----|------|-----|-----|----|------|-----|----|-----|-------|-----|-----|-----|----|-------------|
| 40 Yan, Lun et al. 2015       | Y    | N  | N  | Y    | Y   | N   | N  | PY   | N   | N  | Y   | NP    | N   | Y   | Y   | N  | Very low    |
| 39 Xiao Chao 2016             | Y    | N  | N  | Y    | Y   | N   | N  | Y    | Y   | N  | N   | Y     | Y   | N   | Y   | N  | Very low    |
| 35 Li Nan et al. 2017         | Y    | N  | N  | Y    | Y   | N   | N  | PY   | N   | N  | N   | NP    | N   | N   | NP  | N  | Very low    |
| 30 Ruling Lu et al. 2018      | Y    | N  | N  | Y    | Y   | N   | N  | PY   | Y   | N  | N   | N     | N   | N   | Y   | N  | Very low    |
| 28 Xu, Li-Fang et al. 2018    | Y    | N  | N  | Y    | N   | N   | N  | PY   | Y   | N  | N   | N     | N   | Y   | Y   | N  | Very low    |
| 22 Xu Huayun et al. 2018      | Y    | N  | N  | Y    | Y   | Y   | N  | PY   | Y   | N  | N   | Y     | Y   | N   | Y   | N  | Very low    |
| 21 Huang, Wenfang et al. 2018 | Y    | N  | N  | Y    | Y   | Y   | N  | PY   | Y   | N  | Y   | Y     | Y   | Y   | Y   | N  | Very low    |
| 20 Liu Ying et al. 2019       | Y    | N  | N  | Y    | Y   | N   | N  | PY   | Y   | N  | Y   | NP    | NP  | Y   | N   | N  | Very low    |
| 19 Original Bochao 2019       | Y    | N  | N  | Y    | Y   | Y   | N  | PY   | Y   | N  | NP  | Y     | Y   | N   | N   | N  | Very low    |
| 17 Jilin 2019                 | Y    | N  | N  | Y    | Y   | Y   | N  | PY   | Y   | N  | Y   | Y     | Y   | Y   | Y   | N  | Very low    |
| 13 Xie Peng Peng et al 2019   | Y    | N  | N  | Y    | Y   | Y   | N  | PY   | Y   | N  | N   | Y     | Y   | N   | Y   | N  | Very low    |
| 12 Zhong Yizheng et al. 2019  | Y    | N  | N  | Y    | Y   | Y   | N  | PY   | Y   | N  | Y   | Y     | Y   | Y   | Y   | N  | Very low    |
| 11 Tung Yu Fong 2020          | Y    | N  | N  | Y    | Y   | Y   | N  | PY   | Y   | N  | N   | Y     | Y   | N   | Y   | N  | Very low    |
| 10 Li Nan et al. 2020         | Y    | N  | N  | Y    | Y   | Y   | N  | PY   | Y   | N  | Y   | NP    | N   | Y   | NP  | N  | Very low    |
| 8 Du Xiu et al. 2020          | Y    | N  | N  | Y    | Y   | Y   | N  | PY   | Y   | N  | N   | NP    | N   | N   | Y   | N  | Very low    |
| 7 Limpibe 2020                | Y    | N  | N  | Y    | Y   | Y   | N  | PY   | Y   | N  | N   | NP    | Y   | N   | Y   | N  | Very low    |
| 4 Chan Kam Ming 2020          | Y    | N  | N  | Y    | Y   | Y   | N  | PY   | Y   | N  | Y   | NP    | N   | Y   | NP  | N  | Very low    |
| 2 Wong Ting Ting 2020         | Y    | N  | N  | Y    | Y   | Y   | N  | PY   | Y   | N  | N   | Y     | Y   | N   | N   | N  | Very low    |
| Percentage of reports         | 100% | 0% | 0% | 100% | 94% | 67% | 0% | 100% | 89% | 0% | 39% | 50.0% | 56% | 44% | 67% | 0% |             |

pregnancy rate

| SR | include RCTs               | pregnancy rate                | GRADE quality of evidence | Relegation factors |
|----|----------------------------|-------------------------------|---------------------------|--------------------|
| 40 | Yan, Lun et al. 2015       | 16 OR=3.44, 95%CI(2.66, 4.43) | low                       | ①④                 |
| 39 | Xiao Chao 2016             | 9 RR=1.91, 95%CI(1.59, 2.29)  | low                       | ①⑤                 |
| 35 | Li Nan et al. 2017         | 12 OR=2.96, 95%CI(2.35, 3.74) | very low                  | ①④⑤                |
| 30 | Ruling Lu et al. 2018      | 8 OR=3.34, 95%CI(2.23, 5.02)  | very low                  | ①②④⑤               |
| 28 | Xu, Li-Fang et al. 2018    | 18 OR=3.83, 95%CI(2.95, 4.96) | very low                  | ①④⑤                |
| 22 | Xu Huayun et al. 2018      | 11 RR=1.70, 95%CI(1.39, 2.09) | Moderate                  | ①                  |
| 21 | Huang, Wenfang et al. 2018 | 3 OR=1.97, 95%CI(1.19, 3.25)  | very low                  | ①④⑤                |
| 20 | Liu Ying et al. 2019       | 11 RR=1.71, 95%CI(1.46, 2.01) | low                       | ①⑤                 |
| 19 | Original Bochao 2019       | 7 RR=1.78, 95%CI(1.44, 2.19)  | low                       | ①⑤                 |
| 17 | Jilin 2019                 | 17 OR=2.78, 95%CI(2.21, 3.51) | low                       | ①④                 |
| 12 | Zhong Yizheng et al. 2019  | 6 RR=1.34, 95%CI(1.11, 1.61)  | low                       | ①④                 |
| 11 | Tung Yu Fong 2020          | 8 RR=1.94, 95%CI(1.14, 3.29)  | very low                  | ①④⑤                |
| 10 | Li Nan et al. 2020         | 8 OR=2.49, 95%CI(1.79, 3.45)  | very low                  | ①④⑤                |
| 8  | Du Xiu et al. 2020         | 14 RR=1.68, 95%CI(1.45, 1.94) | Moderate                  | ①                  |
| 7  | Limpibe 2020               | 14 RR=1.69, 95%CI(1.45, 1.98) | low                       | ①④                 |
| 4  | Chan Kam Ming et al. 2020  | 6 RR=1.56, 95%CI(1.27, 1.91)  | low                       | ①④                 |
| 2  | Huang Ting et al. 2020     | 8 RR=2.18, 95%CI(1.55, 3.05)  | very low                  | ①④⑤                |

- ① Limitation; ② Inconsistency; ③ Indirectness;  
④ Publication bias; ⑤ Imprecision.

efficiency

|    | SR                         | include RCTs | efficiency                 | GRADE<br>quality of<br>evidence | Relegation<br>factors |
|----|----------------------------|--------------|----------------------------|---------------------------------|-----------------------|
| 40 | Yan, Lun et al. 2015       | 14           | OR=5.32, 95%CI(3.82, 7.41) | low                             | ①④                    |
| 39 | Xiao Chao 2016             | 7            | RR=1.27, 95%CI(1.19, 1.36) | low                             | ①⑤                    |
| 35 | Li Nan et al. 2017         | 8            | OR=3.90, 95%CI(2.92, 5.20) | low                             | ①④                    |
| 30 | Ruling Lu et al. 2018      | 11           | OR=4.22, 95%CI(2.86, 6.23) | very low                        | ①④⑤                   |
| 28 | Xu, Li-Fang et al. 2018    | 18           | OR=2.83, 95%CI(2.06, 3.88) | very low                        | ①④⑤                   |
| 22 | Xu Huayun et al. 2018      | 13           | RR=1.19, 95%CI(0.87, 1.63) | low                             | ①⑤                    |
| 21 | Huang, Wenfang et al. 2018 | 7            | OR=2.63, 95%CI(1.67, 4.15) | very low                        | ①④⑤                   |
| 17 | Jilin 2019                 | 21           | OR=3.38, 95%CI(2.59, 4.41) | Moderate                        | ①                     |
| 13 | Xie Peng Peng et al 2019   | 14           | RR=1.13, 95%CI(1.02, 1.24) | Moderate                        | ①                     |
| 12 | Zhong Yizheng et al. 2019  | 10           | RR=1.27, 95%CI(1.13, 1.44) | Moderate                        | ①                     |
| 11 | Tung Yu Fong 2020          | 31           | RR=1.26, 95%CI(1.20, 1.32) | Moderate                        | ①                     |
| 10 | Li Nan et al. 2020         | 4            | OR=3.42, 95%CI(1.76, 6.64) | very low                        | ①④⑤                   |
| 7  | Limpibe 2020               | 18           | RR=1.26, 95%CI(1.17, 1.36) | very low                        | ①②④                   |
| 4  | Chan Kam Ming et al. 2020  | 6            | RR=1.26, 95%CI(1.15, 1.37) | low                             | ①④                    |
| 2  | Huang Ting et al. 2020     | 8            | RR=1.25, 95%CI(1.13, 1.37) | very low                        | ①④⑤                   |

ovulation rate

|    | SR                         | include RCTs | ovulation rate             | GRADE quality of evidence | Relegation factors |
|----|----------------------------|--------------|----------------------------|---------------------------|--------------------|
| 40 | Yan, Lun et al. 2015       | 9            | OR=2.18, 95%CI(1.63, 2.92) | very low                  | ①④⑤                |
| 39 | Xiao Chao 2016             | 8            | RR=1.10, 95%CI(0.87, 1.39) | very low                  | ①②④⑤               |
| 35 | Li Nan et al. 2017         | 6            | OR=2.70, 95%CI(1.32, 5.45) | very low                  | ①②④⑤               |
| 21 | Huang, Wenfang et al. 2018 | 6            | OR=2.18, 95%CI(1.77, 2.68) | low                       | ①⑤                 |
| 20 | Liu Ying et al. 2019       | 8            | RR=1.34, 95%CI(1.23, 1.46) | low                       | ①⑤                 |
| 19 | Original Bochao 2019       | 6            | RR=0.97, 95%CI(0.86, 1.09) | very low                  | ①②④⑤               |
| 17 | Jilin 2019                 | 14           | OR=1.92, 95%CI(1.40, 2.64) | low                       | ①②                 |
| 13 | Xie Peng Xin et al 2019    | 10           | RR=1.17, 95%CI(1.02, 1.34) | low                       | ①④                 |
| 12 | Zhong Yizheng et al. 2019  | 5            | RR=1.18, 95%CI(1.03, 1.37) | low                       | ①④                 |
| 10 | Li Nan et al. 2020         | 4            | OR=3.91, 95%CI(1.95, 7.84) | very low                  | ①④⑤                |
| 8  | Du Xiu et al. 2020         | 6            | RR=1.17, 95%CI(1.03, 1.34) | very low                  | ①②④                |
| 7  | Limpibe 2020               | 6            | RR=1.31, 95%CI(1.16, 1.48) | low                       | ①④                 |
| 4  | Chan Kam Ming et al. 2020  | 3            | RR=1.21, 95%CI(1.07, 1.37) | very low                  | ①④⑤                |

T

|    | SR                        | include RCTs | T                              | GRADE quality of evidence | Relegation factors |
|----|---------------------------|--------------|--------------------------------|---------------------------|--------------------|
| 39 | Xiao Chao 2016            | 8            | SMD=-0.81, 95%CI(-1.46, -0.16) | very low                  | ①②④⑤               |
| 19 | Original Bochao 2019      | 5            | MD=-1.51, 95%CI(-1.64, -1.37)  | very low                  | ①④⑤                |
| 17 | Jilin 2019                | 24           | SMD=-0.64, 95%CI(-0.97, -0.36) | very low                  | ①②⑤                |
| 13 | Xie Peng Peng et al 2019  | 13           | WMD=-0.93, 95%CI(-1.38, -0.28) | very low                  | ①②④⑤               |
| 12 | Zhong Yizheng et al. 2019 | 9            | SMD=-1.59, 95%CI(-1.76, -1.41) | very low                  | ①②④                |
| 11 | Tung Yu Fong 2020         | 37           | SMD=-0.40, 95%CI(-0.65, -0.15) | very low                  | ①②④                |
| 10 | Li Nan et al. 2020        | 3            | SMD=-0.68, 95%CI(-3.99, 2.62)  | very low                  | ①②④⑤               |
| 8  | Du Xiu et al. 2020        | 5            | RR=-0.53, 95%CI(-0.90, -0.16)  | very low                  | ①②④                |
| 7  | Limpibe 2020              | 19           | SMD=-0.20, 95%CI(-0.55, 0.16)  | very low                  | ①②④⑤               |
| 4  | Chan Kam Ming et al. 2020 | 2            | MD=0.95, 95%CI(0.15, 1.75)     | very low                  | ①②④⑤               |



## LH

|    | SR                        | include RCTs | LH                             | GRADE quality of evidence | Relegation factors |
|----|---------------------------|--------------|--------------------------------|---------------------------|--------------------|
| 39 | Xiao Chao 2016            | 7            | SMD=-1.16, 95%CI(-1.66, -0.66) | very low                  | ①②④⑤               |
| 30 | Ruling Lu et al. 2018     | 18           | MD=-1.84, 95%CI(-1.98, -1.70)  | very low                  | ①②⑤                |
| 19 | Original Bochao 2019      | 5            | MD=-6.72, 95%CI(-7.32, -6.13)  | very low                  | ①④⑤                |
| 17 | Jilin 2019                | 23           | SMD=-0.55, 95%CI(-0.74, -0.37) | low                       | ①④                 |
| 13 | Xie Peng Peng et al 2019  | 13           | WMD=-0.95, 95%CI(-1.41, -0.52) | very low                  | ①②④                |
| 12 | Zhong Yizheng et al. 2019 | 9            | SMD=-1.24, 95%CI(-1.39, -1.08) | very low                  | ①②④                |
| 11 | Tung Yu Fong 2020         | 39           | SMD=-0.38, 95%CI(-0.59, -0.16) | very low                  | ①②④                |
| 10 | Li Nan et al. 2020        | 5            | SMD=1.67, 95%CI(-1.97, -1.37)  | very low                  | ①②④                |
| 7  | Limpibe 2020              | 17           | SMD=-0.78, 95%CI(-1.22, -0.34) | very low                  | ①②④                |
| 4  | Chan Kam Ming et al. 2020 | 2            | MD=7.55, 95%CI(2.05, 13.04)    | very low                  | ①②④⑤               |

FSH

|    |                           |    |                                |          |      |
|----|---------------------------|----|--------------------------------|----------|------|
| 17 | Jilin 2019                | 19 | SMD=0.12, 95%CI(-0.29, -0.53)  | very low | ①②④  |
| 13 | Xie Peng Peng et al 2019  | 11 | WMD=-0.59, 95%CI(-0.98, -0.20) | very low | ①②④  |
| 12 | Zhong Yizheng et al. 2019 | 8  | SMD=0.66, 95%CI(0.51, 0.82)    | low      | ①④   |
| 11 | Tung Yu Fong 2020         | 37 | SMD=0.01, 95%CI(-0.22, 0.25)   | very low | ①②④⑤ |
| 10 | Li Nan et al. 2020        | 5  | SMD=-1.67, 95%CI(-3.05, -0.30) | very low | ①②④⑤ |
| 4  | Chan Kam Ming et al. 2020 | 2  | MD=0.13, 95%CI(-0.39, 0.66)    | very low | ①②④⑤ |

adverse effects

|    | SR                      | include RCTs | adverse effects              | GRADE quality of evidence | Relegation factors |
|----|-------------------------|--------------|------------------------------|---------------------------|--------------------|
| 40 | Yan, Lun et al. 2015    | 4            | OR=0.19, 95%CI(0.08, 0.46)   | low                       | ①⑤                 |
| 39 | Xiao Chao 2016          | 4            | RD=-0.05, 95%CI(-0.13, 0.03) | very low                  | ①②⑤                |
| 35 | Li Nan et al. 2017      | 3            | OR=0.07, 95%CI(0.02, 0.23)   | very low                  | ①②④⑤               |
| 28 | Xu, Li-Fang et al. 2018 | 10           | OR=0.26, 95%CI(0.09, 0.80)   | low                       | ①⑤                 |
| 17 | Jilin 2019              | 13           | OR=0.26, 95%CI(0.12, 0.55)   | very low                  | ①②⑤                |
| 11 | Tung Yu Fong 2020       | 8            | RR=0.12, 95%CI(0.06, 0.25)   | low                       | ①④                 |
| 7  | Limpibe 2020            | 13           | RR=0.36, 95%CI(0.20, 0.63)   | low                       | ①④                 |

## LH/FSH

|    | SR                       | include RCTs | L/F                            | GRADE quality of evidence | Relegation factors |
|----|--------------------------|--------------|--------------------------------|---------------------------|--------------------|
| 39 | Xiao Chao 2016           | 4            | MD=-0.81, 95%CI(-1.17, -0.45)  | very low                  | ①②④⑤               |
| 30 | Ruling Lu et al. 2018    | 12           | MD=-0.25, 95%CI(-0.44, -0.06)  | very low                  | ①②⑤                |
| 17 | Jilin 2019               | 11           | SMD=-0.45, 95%CI(-0.68, -0.23) | low                       | ①②                 |
| 13 | Xie Peng Peng et al 2019 | 3            | WMD=-1.04, 95%CI(-1.78, -0.33) | very low                  | ①②④⑤               |
| 11 | Tung Yu Fong 2020        | 22           | SMD=-0.39, 95%CI(-0.60, -0.19) | very low                  | ①②④                |
| 7  | Limpibe 2020             | 14           | MD=-0.37, 95%CI(-0.53, -0.21)  | very low                  | ①②④                |
